# Supplementary material for: A systems biology approach reveals common metastatic pathways in osteosarcoma
Source: Springer Nature journal article supplement (doi:10.1186/1752-0509-6-50), 2012-05-28
Supplement: 12918_2011_908_MOESM1_ESM.pdf [file 12918_2011_908_MOESM1_ESM.pdf]

**Supplemental Table 1.** Significant Pathways from the Ontology enrichment of the down-regulated genes in the HOS/143B model and SaOS-2/LM7 model.

| <b>Significant Pathways from downregulated genes in HOS/143B model</b>        | <b>Significant Pathways from downregulated genes in SaOS-2/LM7 model</b>       |
|-------------------------------------------------------------------------------|--------------------------------------------------------------------------------|
| Cell adhesion_Chemokines and adhesion                                         | <b>Muscle contraction_GPCRs in the regulation of smooth muscle tone</b>        |
| Cell adhesion_ECM remodeling                                                  | <b>Cytoskeleton remodeling_Regulation of actin cytoskeleton by Rho GTPases</b> |
| Immune response_Oncostatin M signaling via MAPK in human cells                | Cell adhesion_Tight junctions                                                  |
| Cytoskeleton remodeling_Cytoskeleton remodeling                               | Signal transduction_PKA signaling                                              |
| Cytoskeleton remodeling_TGF, WNT and cytoskeletal remodeling                  | <b>Development_MAG-dependent inhibition of neurite outgrowth</b>               |
| Development_Regulation of epithelial-to-mesenchymal transition (EMT)          |                                                                                |
| Cell adhesion_Integrin-mediated cell adhesion and migration                   |                                                                                |
| Immune response_Oncostatin M signaling via MAPK in mouse cells                |                                                                                |
| Immune response_Oncostatin M signaling via JAK-Stat in human cells            |                                                                                |
| Cell adhesion_PLAU signaling                                                  |                                                                                |
| Transport_Macropinocytosis regulation by growth factors                       |                                                                                |
| Cell adhesion_Role of tetraspanins in the integrin-mediated cell adhesion     |                                                                                |
| Development_Beta-adrenergic receptors transactivation of EGFR                 |                                                                                |
| Cell adhesion_Cell-matrix glycoconjugates                                     |                                                                                |
| Development_TGF-beta-dependent induction of EMT via MAPK                      |                                                                                |
| Development_FGFR signaling pathway                                            |                                                                                |
| Immune response_Oncostatin M signaling via JAK-Stat in mouse cells            |                                                                                |
| Development_EPO-induced Jak-STAT pathway                                      |                                                                                |
| Development_Dopamine D2 receptor transactivation of EGFR                      |                                                                                |
| Development_Slit-Robo signaling                                               |                                                                                |
| Development_TGF-beta receptor signaling                                       |                                                                                |
| Cytoskeleton remodeling_Fibronectin-binding integrins in cell motility        |                                                                                |
| Development_S1P2 and S1P3 receptors in cell proliferation and differentiation |                                                                                |
| Development_PDGF signaling via STATs and NF-kB                                |                                                                                |
| Development_TGF-beta-dependent induction of EMT via RhoA, PI3K and ILK.       |                                                                                |
| Apoptosis and survival_Caspase cascade                                        |                                                                                |
| Development_S1P1 receptor signaling via beta-arrestin                         |                                                                                |
| Normal and pathological TGF-beta-mediated regulation of cell proliferation    |                                                                                |
| Translation_Non-genomic (rapid) action of Androgen Receptor                   |                                                                                |

|                                                                                                   |
|---------------------------------------------------------------------------------------------------|
| Development_PIP3 signaling in cardiac myocytes                                                    |
| Immune response_IL-2 activation and signaling pathway                                             |
| Apoptosis and survival_BAD phosphorylation                                                        |
| <b>Cytoskeleton remodeling_Regulation of actin cytoskeleton by Rho GTPases</b>                    |
| Immune response_IL-6 signaling pathway                                                            |
| Immune response_IL-9 signaling pathway                                                            |
| Development_Prolactin receptor signaling                                                          |
| <b>Development_MAG-dependent inhibition of neurite outgrowth</b>                                  |
| Development_IGF-1 receptor signaling                                                              |
| Neurophysiological process_Receptor-mediated axon growth repulsion                                |
| Transcription_Androgen Receptor nuclear signaling                                                 |
| Development_Ligand-independent activation of ESR1 and ESR2                                        |
| Cytoskeleton remodeling_Neurofilaments                                                            |
| Signal transduction_PTEN pathway                                                                  |
| Development_ERBB-family signaling                                                                 |
| Membrane-bound ESR1: interaction with G-proteins signaling                                        |
| Immune response_IFN gamma signaling pathway                                                       |
| Development_Gastrin in cell growth and proliferation                                              |
| Development_Alpha-2 adrenergic receptor activation of ERK                                         |
| Development_FGF2-dependent induction of EMT                                                       |
| Development_BMP signaling                                                                         |
| Development_EGFR signaling pathway                                                                |
| Immune response_IL-15 signaling                                                                   |
| Cell adhesion_Integrin inside-out signaling                                                       |
| Development_Keratinocyte differentiation                                                          |
| Development_CNTF receptor signaling                                                               |
| Cytoskeleton remodeling_Integrin outside-in signaling                                             |
| Cell adhesion_Plasmin signaling                                                                   |
| Development_TGF-beta-dependent induction of EMT via SMADs                                         |
| <b>Muscle contraction_GPCRs in the regulation of smooth muscle tone</b>                           |
| Development_EDNRB signaling                                                                       |
| Development_Role of IL-8 in angiogenesis                                                          |
| Development_VEGF signaling via VEGFR2 - generic cascades                                          |
| Development_S1P3 receptor signaling pathway                                                       |
| Chemotaxis_Inhibitory action of lipoxins on IL-8- and Leukotriene B4-induced neutrophil migration |
| Some pathways of EMT in cancer cells                                                              |
| Immune response_IL-17 signaling pathways                                                          |
| Development_FGF-family signaling                                                                  |
| Development_Delta-type opioid receptor mediated cardioprotection                                  |

|                                                                                             |
|---------------------------------------------------------------------------------------------|
| Immune response_IL-4 - antiapoptotic action                                                 |
| Cell adhesion_Gap junctions                                                                 |
| Immune response_Signaling pathway mediated by IL-6 and IL-1                                 |
| Cell adhesion_Histamine H1 receptor signaling in the interruption of cell barrier integrity |
| Immune response_Role of integrins in NK cells cytotoxicity                                  |
| Proteolysis_Role of Parkin in the Ubiquitin-Proteasomal Pathway                             |
| Immune response_IFN alpha/beta signaling pathway                                            |
| Cell adhesion_Endothelial cell contacts by non-junctional mechanisms                        |
| Development_Transactivation of PDGFR in non-neuronal cells by Dopamine D2 receptor          |
| Development_G-Proteins mediated regulation MAPK-ERK signaling                               |
| Development_Endothelin-1/EDNRA transactivation of EGFR                                      |
| Transport_Clathrin-coated vesicle cycle                                                     |
| Transcription_Receptor-mediated HIF regulation                                              |
| PGE2 pathways in cancer                                                                     |
| Transcription_CREB pathway                                                                  |
| Apoptosis and survival_Apoptotic Activin A signaling                                        |
| Development_Neurotrophin family signaling                                                   |
| Cytoskeleton remodeling_Alpha-1A adrenergic receptor-dependent inhibition of PI3K           |
| Immune response_Histamine H1 receptor signaling in immune response                          |
| Development_Angiotensin activation of ERK                                                   |
| Development_EGFR signaling via small GTPases                                                |
| Immune response_IL-22 signaling pathway                                                     |
| Muscle contraction_Delta-type opioid receptor in smooth muscle contraction                  |
| Inhibitory action of Lipoxins on neutrophil migration                                       |
| Development_VEGF-family signaling                                                           |
| Development_PEDF signaling                                                                  |
| Immune response_Role of HMGB1 in dendritic cell maturation and migration                    |
| Inhibitory action of Lipoxin A4 on PDGF, EGF and LTD4 signaling                             |
| Signal transduction_AKT signaling                                                           |
| Development_Mu-type opioid receptor regulation of proliferation                             |
| Development_Lipoxin inhibitory action on PDGF, EGF and LTD4 signaling                       |
| Immune response_IL-4 signaling pathway                                                      |
| Immune response_PGE2 in immune and neuroendocrine system interactions                       |
| Development_Flt3 signaling                                                                  |
| Immune response_IL-1 signaling pathway                                                      |
| Immune response_HMGB1/RAGE signaling pathway                                                |

|                                                                                          |
|------------------------------------------------------------------------------------------|
| Cell cycle_Influence of Ras and Rho proteins on G1/S Transition                          |
| NGF activation of NF-kB                                                                  |
| Development_Thrombopoietin signaling via JAK-STAT pathway                                |
| Development_Thrombopoietin-regulated cell processes                                      |
| G-protein signaling_G-Protein alpha-12 signaling pathway                                 |
| Muscle contraction_S1P2 receptor-mediated smooth muscle contraction                      |
| Development_HGF signaling pathway                                                        |
| Development_PDGF signaling via MAPK cascades                                             |
| Immune response_IL-3 activation and signaling pathway                                    |
| Immune response_CD40 signaling                                                           |
| Blood coagulation_Blood coagulation                                                      |
| Development_Mu-type opioid receptor signaling via Beta-arrestin                          |
| Cytoskeleton remodeling_FAK signaling                                                    |
| Apoptosis and survival_Ceramides signaling pathway                                       |
| Reproduction_Progesterone-mediated oocyte maturation                                     |
| Apoptosis and survival_Granzyme B signaling                                              |
| Cell cycle_Role of Nek in cell cycle regulation                                          |
| Signal transduction_ERK1/2 signaling pathway                                             |
| Immune response_CCR3 signaling in eosinophils                                            |
| Apoptosis and survival_Anti-apoptotic TNFs/NF-kB/Bcl-2 pathway                           |
| G-protein signaling_Regulation of CDC42 activity                                         |
| Apoptosis and survival_HTR1A signaling                                                   |
| Development_GM-CSF signaling                                                             |
| Immune response_IL-13 signaling via PI3K-ERK                                             |
| Apoptosis and survival_Apoptotic TNF-family pathways                                     |
| Immune response_IL-10 signaling pathway                                                  |
| Signal transduction_Erk Interactions: Inhibition of Erk                                  |
| Chemotaxis_CXCR4 signaling pathway                                                       |
| Apoptosis and survival_Role of CDK5 in neuronal death and survival                       |
| Regulation of lipid metabolism_Insulin regulation of fatty acid methabolism              |
| Regulation of lipid metabolism_Regulation of fatty acid synthase activity in hepatocytes |
| Development_ACM2 and ACM4 activation of ERK                                              |
| Immune response_HTR2A-induced activation of cPLA2                                        |
| Transcription_Role of VDR in regulation of genes involved in osteoporosis                |
| Transport_Intracellular cholesterol transport in norm                                    |
| Immune response_PGE2 common pathways                                                     |
| Blood coagulation_GPCRs in platelet aggregation                                          |
| G-protein signaling_S1P2 receptor signaling                                              |
| Development_Angiopoietin - Tie2 signaling                                                |

|                                                                                        |
|----------------------------------------------------------------------------------------|
| Development_S1P1 signaling pathway                                                     |
| Translation_Regulation of EIF4F activity                                               |
| Cytoskeleton remodeling_Keratin filaments                                              |
| Development_Activation of ERK by Kappa-type opioid receptor                            |
| Development_Thrombospondin-1 signaling                                                 |
| Development_Membrane-bound ESR1: interaction with growth factors signaling             |
| Role of alpha-6/beta-4 integrins in carcinoma progression                              |
| Signal transduction_Calcium signaling                                                  |
| Regulation of metabolism_Bile acids regulation of glucose and lipid metabolism via FXR |
| Development_GDNF family signaling                                                      |
| Chemotaxis_Lipoxin inhibitory action on fMLP-induced neutrophil chemotaxis             |
| Glutathione metabolism                                                                 |

**Supplemental Table 1 Legend.**

Supplemental Table 1 shows all the significant pathways identified by MetaCore using all the significantly down-regulated genes from HOS/143B and SaOS-2/LM7 models. False discovery rate was calculated for all identified pathways and a cutoff of FDR < 0.05 was set to define pathways as significant. The 3 common pathways between the two models are highlighted in bold.

**Supplemental Tables 2a and 2b.** Cytoskeleton/TGF/WNT Pathway proteins up-regulated in the RPPA on HOS/143B model and SaOS-2/LM7.

**Supplemental Table 2a.** Cytoskeleton/TGF/WNT Pathway proteins up-regulated in the RPPA on HOS/143B model. Out of 120 proteins in the RPPA, 35 were up-regulated in HOS/143B model. 11 of the up-regulated proteins belong to the Cytoskeleton/TGF/WNT Pathway

| Gene Symbol | Accession # | Log 2 | Function                                                                                                                                                                          |
|-------------|-------------|-------|-----------------------------------------------------------------------------------------------------------------------------------------------------------------------------------|
| CTNNB1      | IPI00017292 | 0.87  | Key downstream component of the canonical Wnt signaling pathway involved in the regulation of cell adhesion                                                                       |
| PTK2        | IPI00793270 | 0.76  | Implicated in signaling pathways involved in cell motility, proliferation and apoptosis                                                                                           |
| TP53        | IPI00025087 | 0.72  | Acts as a tumor suppressor in many tumor types; induces growth arrest or apoptosis                                                                                                |
| CCND1       | IPI00028098 | 0.60  | Regulatory component that inhibits members of the retinoblastoma protein family and regulates the cell-cycle                                                                      |
| MAP2K1      | IPI00219604 | 0.57  | Mediates diverse functions such as cell growth, adhesion, survival and differentiation                                                                                            |
| XIAP        | IPI00303890 | 0.52  | Multiple functions including regulation of apoptosis and inflammatory signaling, copper homeostasis, mitogenic kinase signaling, cell proliferation, cell invasion and metastasis |
| MTOR        | IPI00031410 | 0.35  | Central regulator of cellular metabolism, growth and survival in response to hormones, growth factors, nutrients, energy and stress signals                                       |
| AKT1        | IPI00012866 | 0.34  | Regulate many processes including metabolism, proliferation, cell survival, growth and angiogenesis.                                                                              |
| MAPK1       | IPI00003479 | 0.31  | Mediates diverse biological functions such as cell growth, adhesion, survival and differentiation                                                                                 |
| PXN         | IPI00220030 | 0.30  | Cytoskeletal protein involved in actin-membrane attachment at sites of cell adhesion to the extracellular matrix                                                                  |
| JUN         | IPI00008965 | 0.30  | Transcription factor that interacts directly with specific target DNA sequences to regulate gene expression ( enhancer heptamer motif 5'-TGA[CG]TCA-3')                           |

**Supplemental Table 2b.** Cytoskeleton/TGF/WNT Pathway proteins up-regulated in the RPPA on SaOS-2/LM7 model. Out of 120 proteins in the RPPA, 14 were up-regulated in the SaOS-2/LM7 model. 6 of the up-regulated proteins belong to the Cytoskeleton/TGF/WNT Pathway

| <b>Gene Symbol</b> | <b>Accession #</b> | <b>Log 2</b> | <b>Function</b>                                                                                                                             |
|--------------------|--------------------|--------------|---------------------------------------------------------------------------------------------------------------------------------------------|
| AKT1               | IPI00012866        | 1.02         | Regulate many processes including metabolism, proliferation, cell survival, growth and angiogenesis                                         |
| FN1                | IPI00022418        | 0.74         | Involved in cell adhesion, cell motility, opsonization, wound healing, and maintenance of cell shape                                        |
| PXN                | IPI00220030        | 0.34         | Cytoskeletal protein involved in actin-membrane attachment at sites of cell adhesion to the extracellular matrix                            |
| MTOR               | IPI00031410        | 0.34         | Central regulator of cellular metabolism, growth and survival in response to hormones, growth factors, nutrients, energy and stress signals |
| CAV1               | IPI00009236        | 0.33         | May act as a scaffolding protein within caveolar membranes, and regulate G-protein alpha subunits activity                                  |
| MAPK14             | IPI00002857        | 0.30         | Important role in cellular responses evoked by extracellular stimuli such leading to activation of transcription factors                    |
