# Supplementary material for: A systems biology approach reveals common metastatic pathways in osteosarcoma
Source: Springer Nature journal article supplement (doi:10.1186/1752-0509-6-50), 2012-05-28

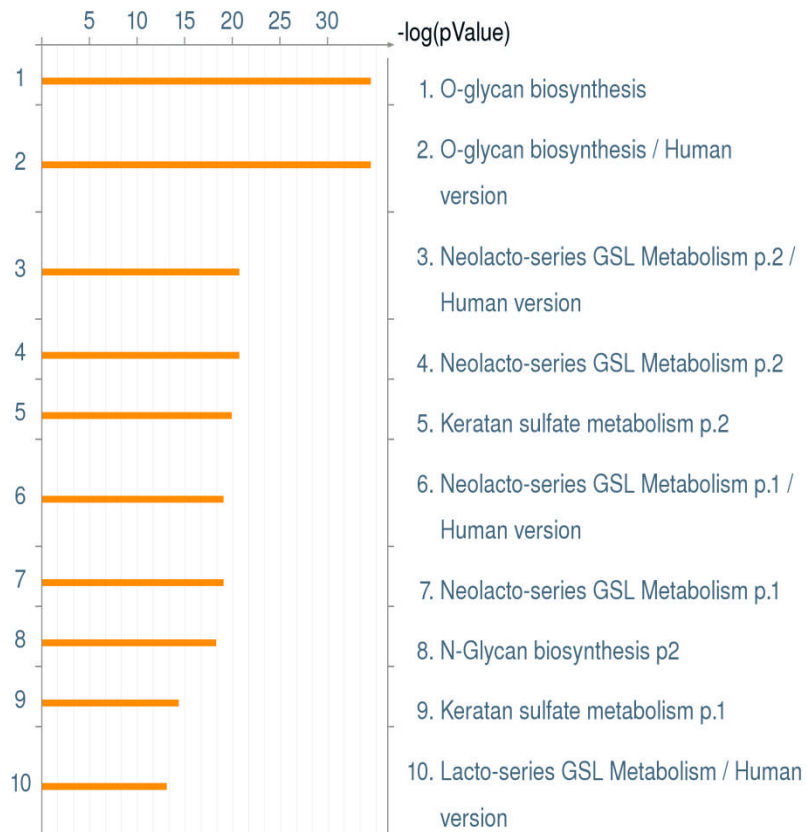

Supplement: 12918_2011_908_MOESM2_ESM.pdf [file 12918_2011_908_MOESM2_ESM.pdf]
