# Supplementary material for: A systems biology approach reveals common metastatic pathways in osteosarcoma
Source: Springer Nature journal article supplement (doi:10.1186/1752-0509-6-50), 2012-05-28
Supplement: 12918_2011_908_MOESM8_ESM.pdf [file 12918_2011_908_MOESM8_ESM.pdf]

**HOS**    **143B**

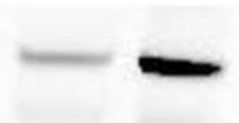

Atase

**SaOS-2**    **LM7**

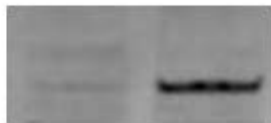

Vimentin

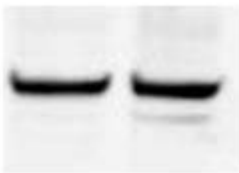

Tubulin

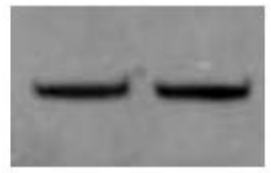

Tubulin
